# Supplementary figures and images for: Drug and Disease Model Resources: A Consortium to Create Standards and Tools to Enhance Model-Based Drug Development
Source: PubMed Central journal article supplement — CPT Pharmacometrics Syst Pharmacol. 2013 Mar 20;2(3):e34–. doi: 10.1038/psp.2013.10 (PMC3615532; doi:10.1038/psp.2013.10), 2013-03-20

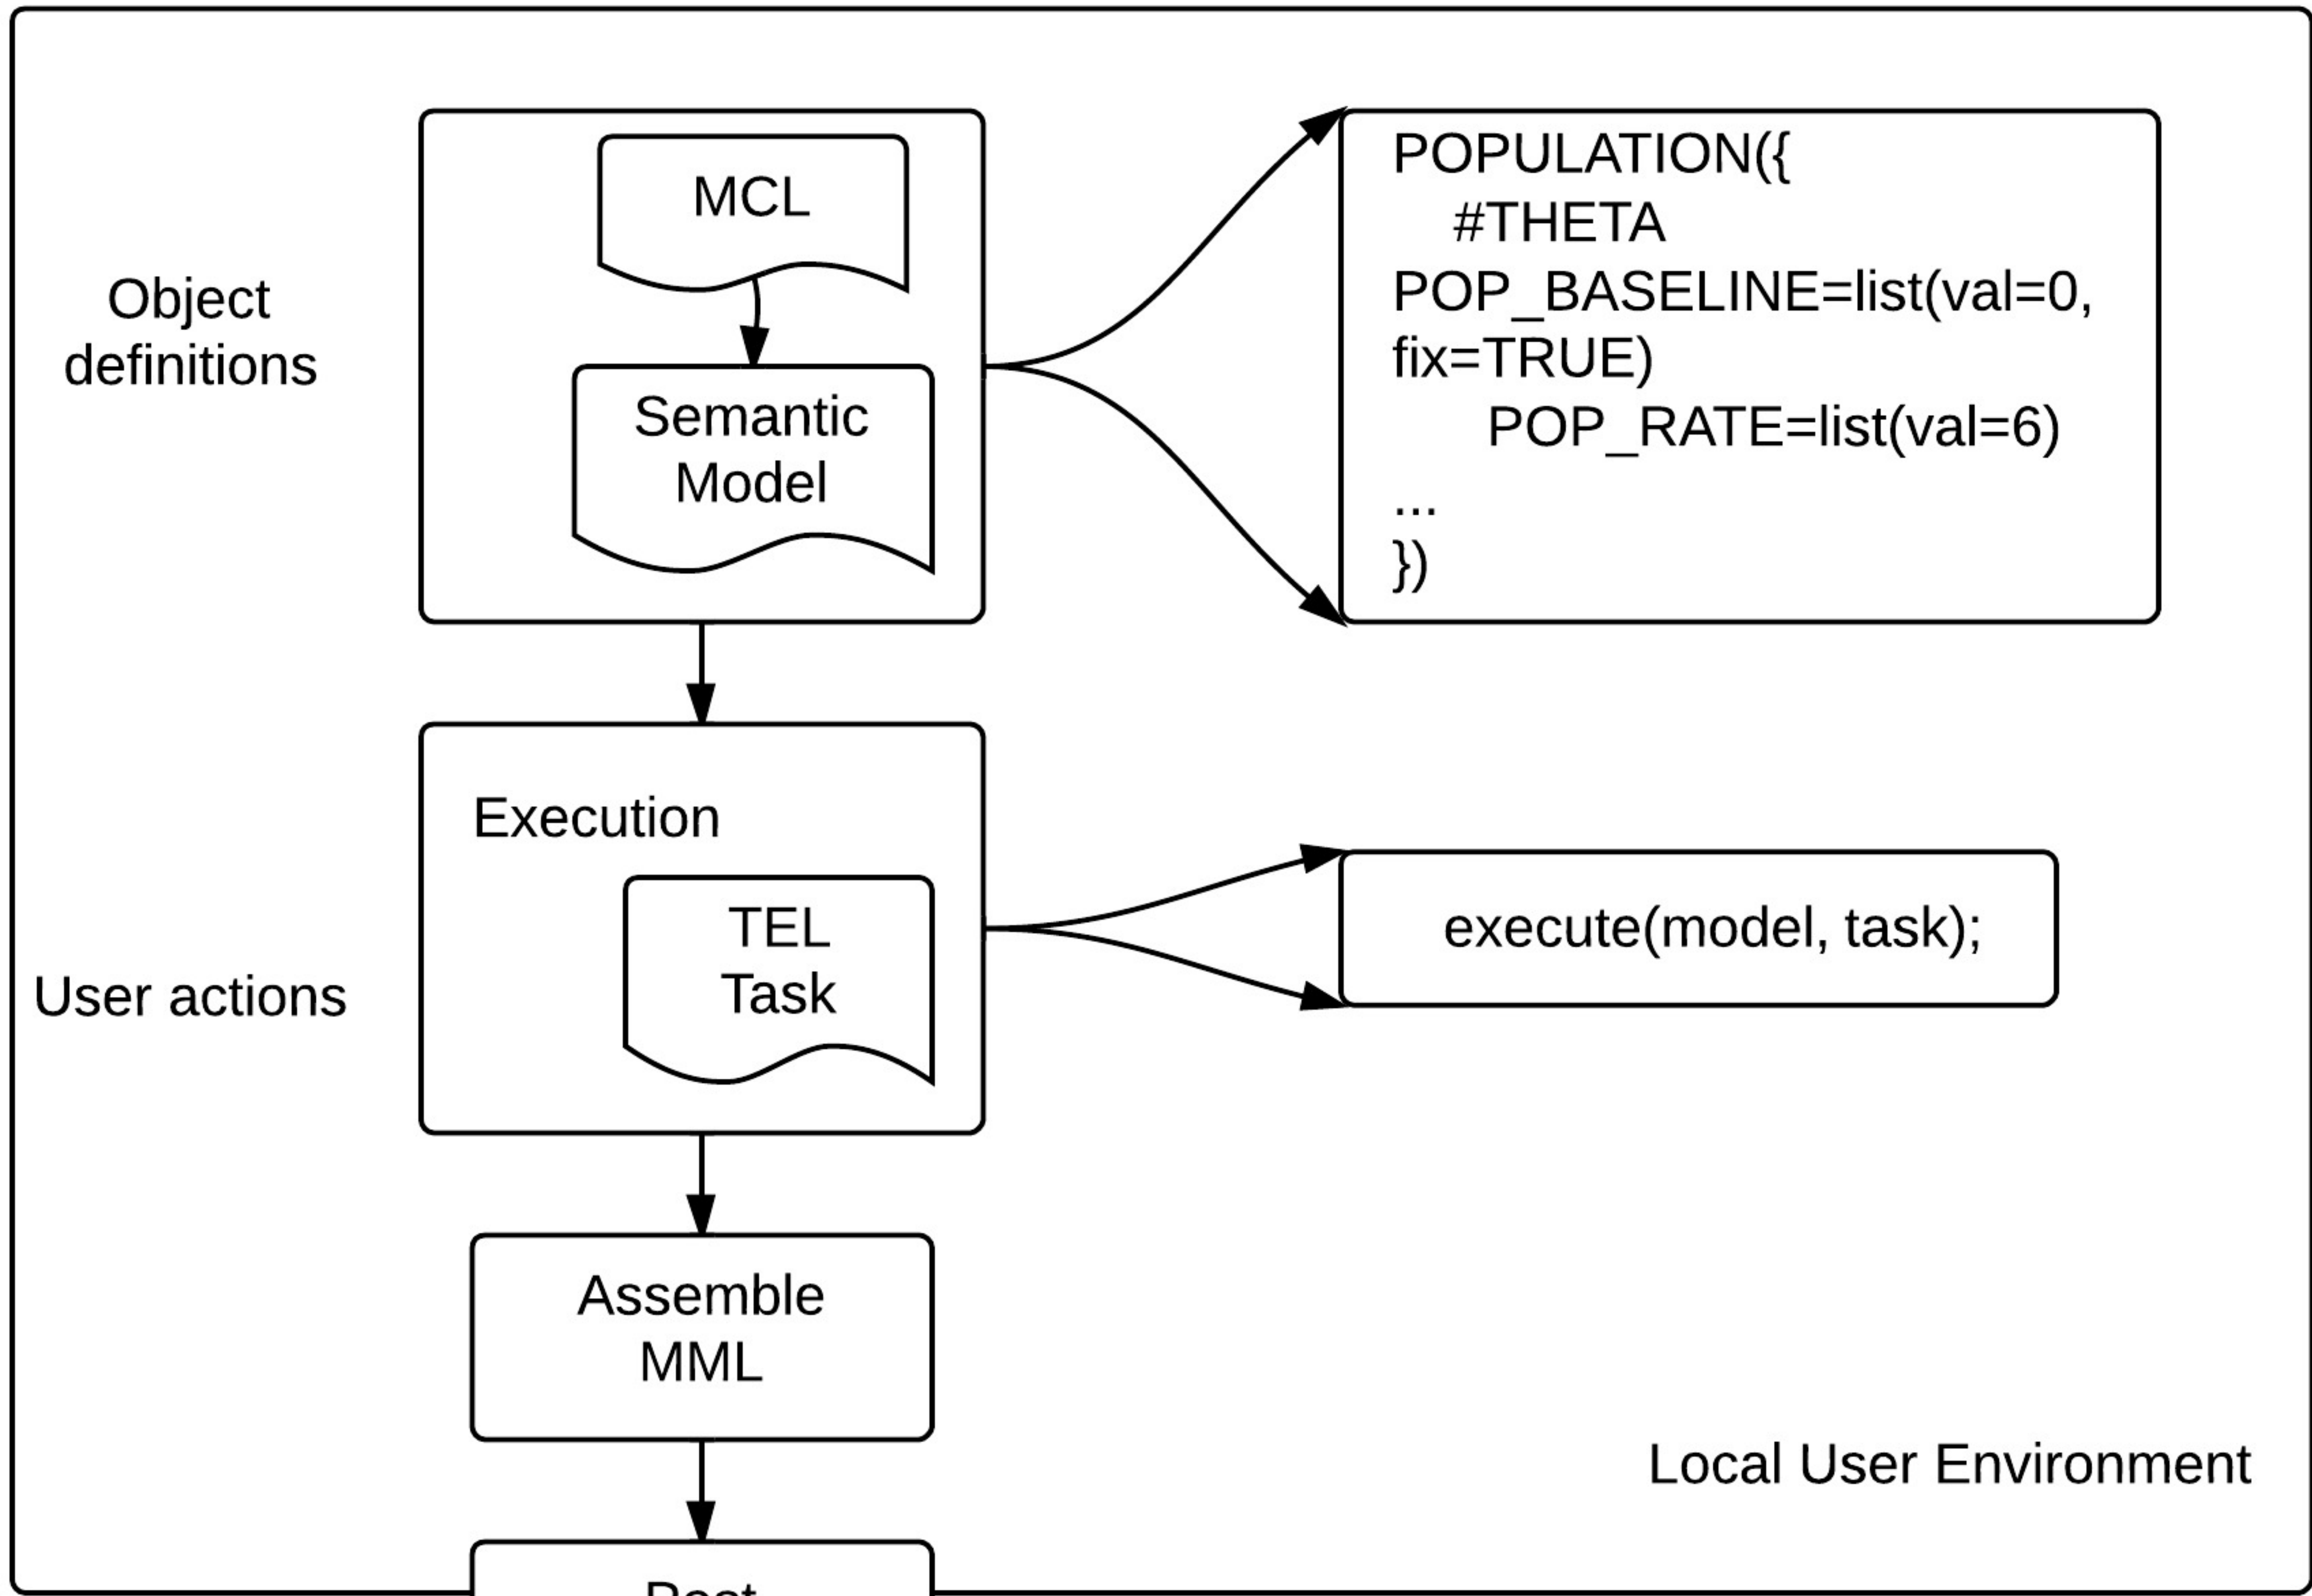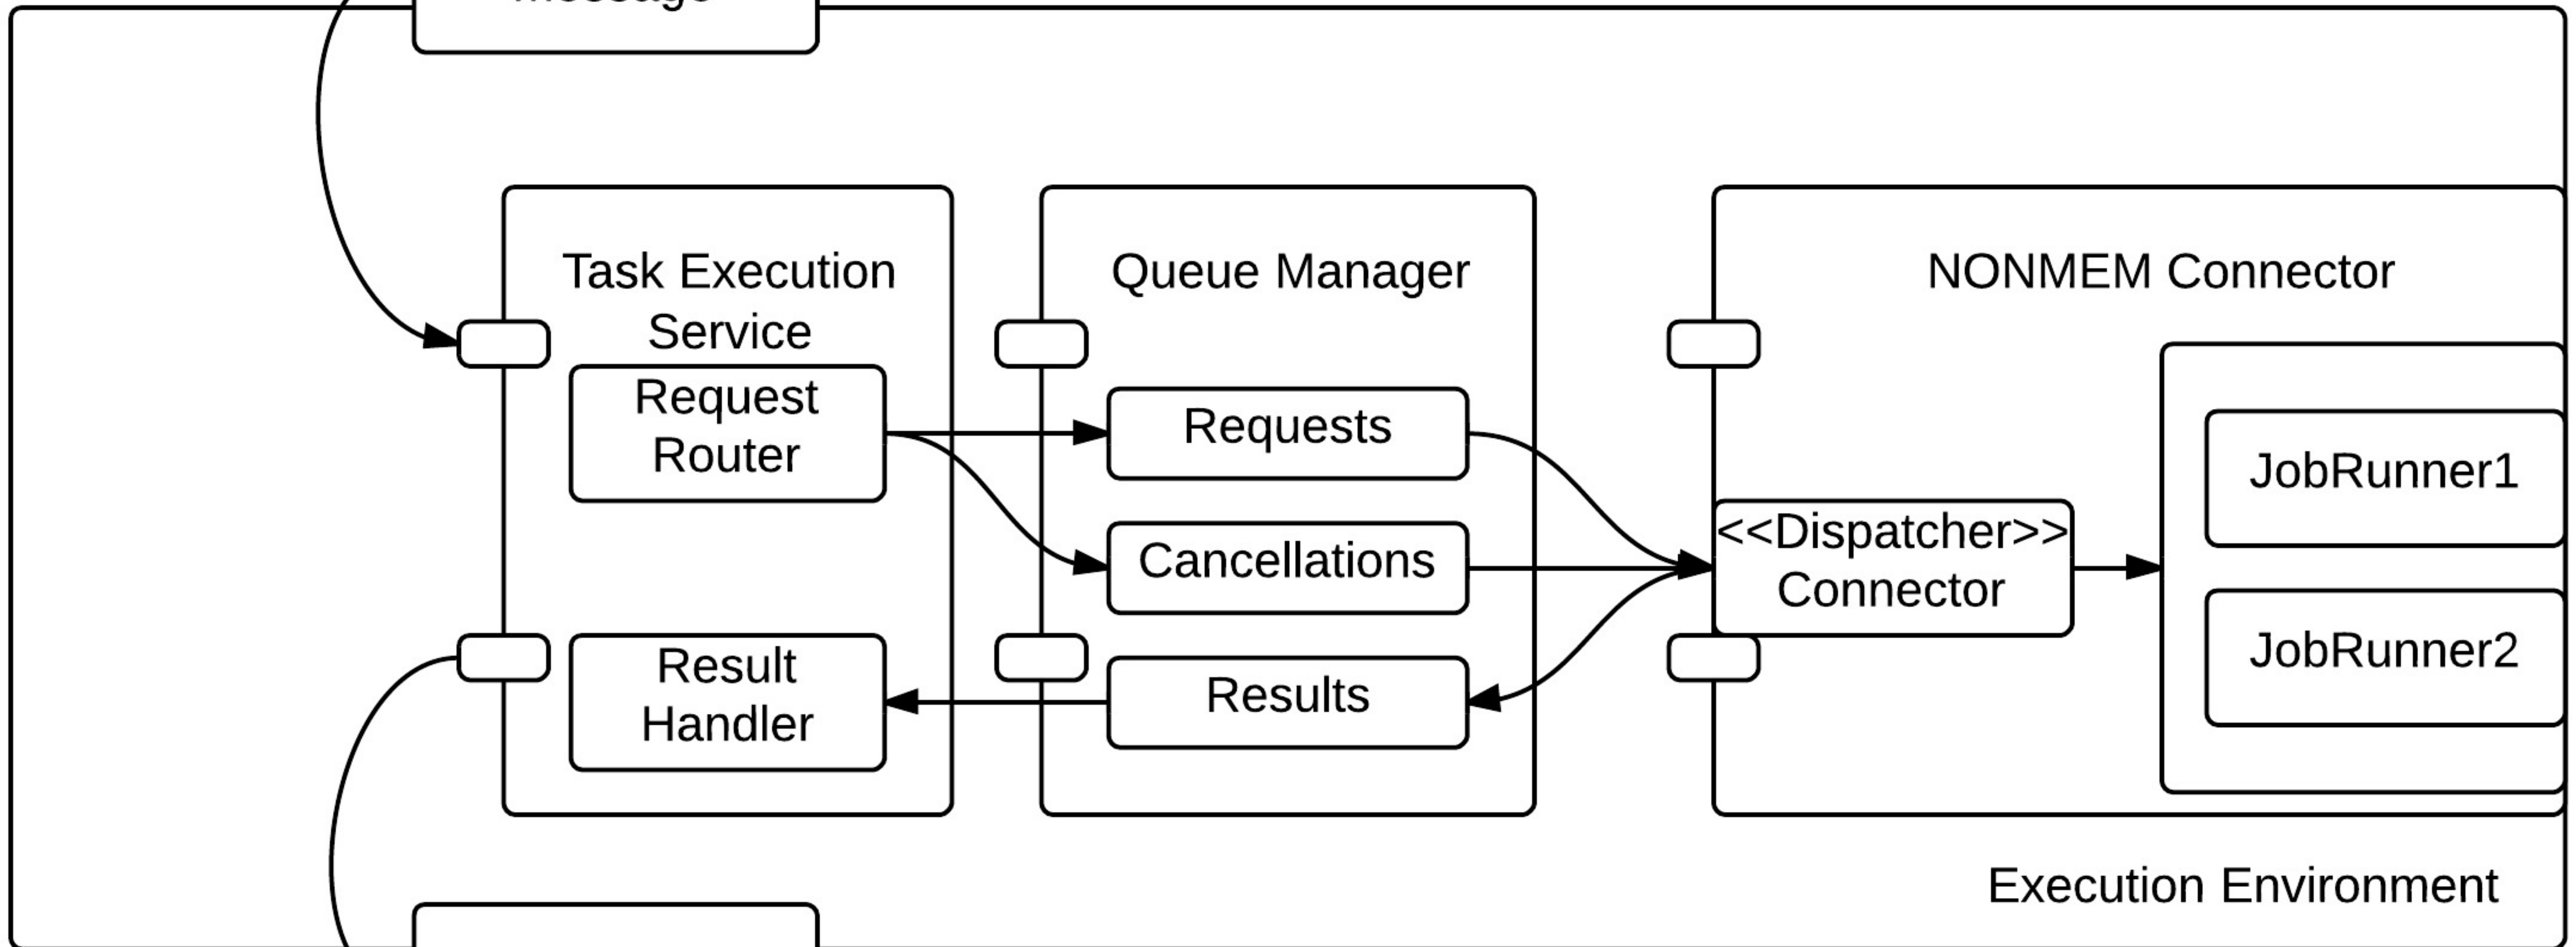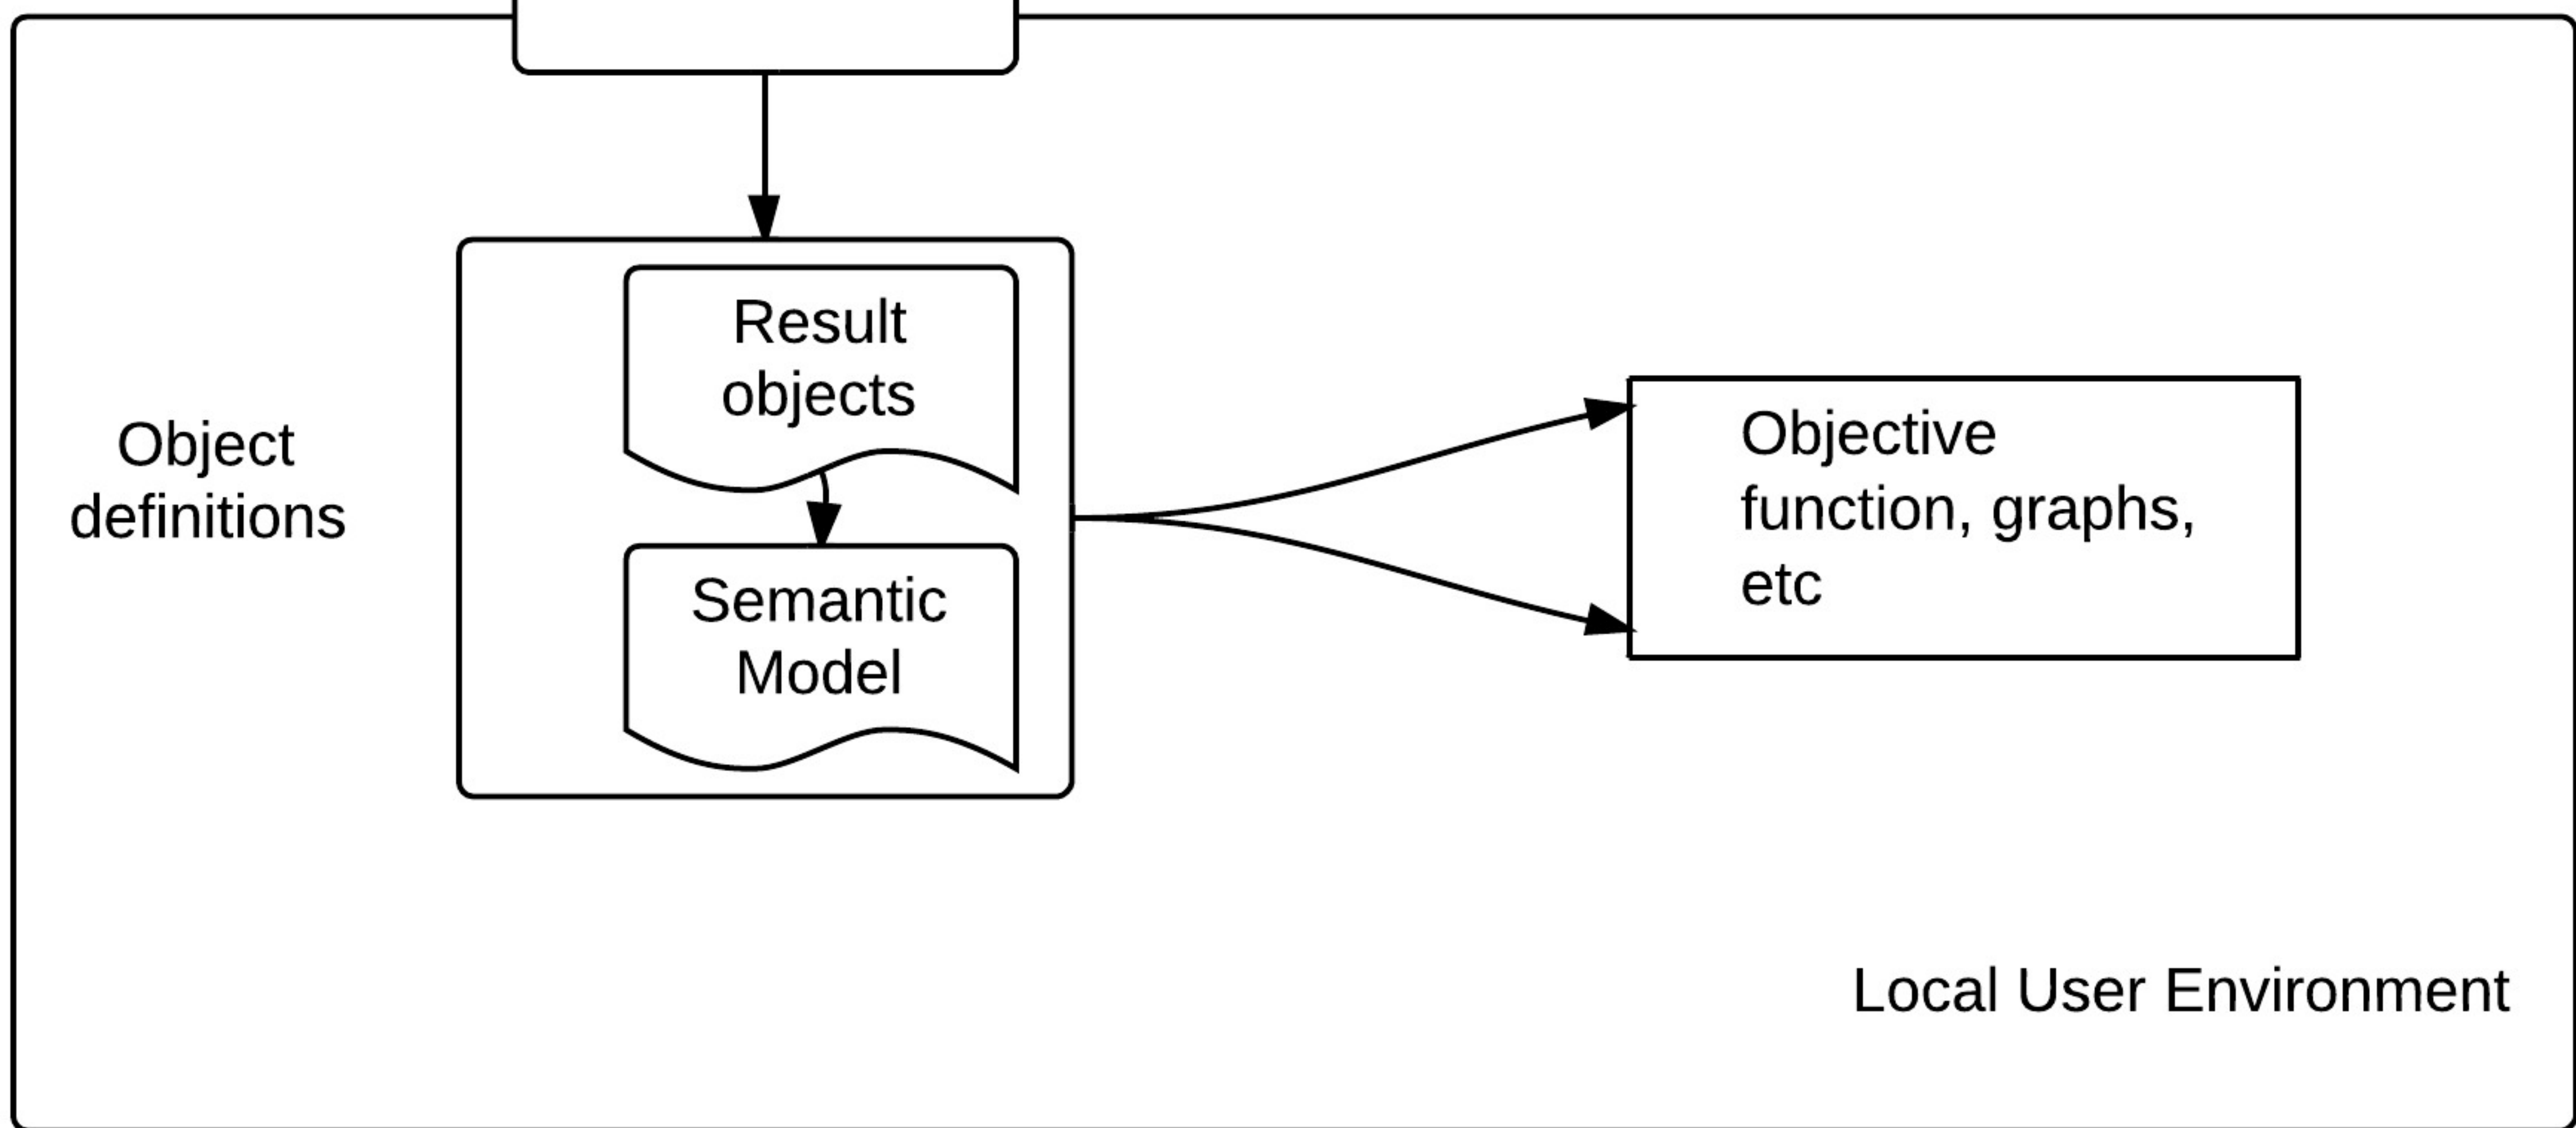

Supplement: psp201310x1.pdf [file psp201310x1.pdf]
